# Supplementary material for: Ets-2 Propagates IL-6 Trans-Signaling Mediated Osteoclast-Like Changes in Human Rheumatoid Arthritis Synovial Fibroblast
Source: Frontiers journal article supplement (doi:10.3389/fimmu.2021.746503), 2021-11-02

## SUPPLEMENTARY METHODS

**Antibodies and Reagents.** Recombinant human IL-6 (Catalog no. 206-IL-200), IL-6R (Catalog no. 227-SR), MC-SF (Catalog no. 216-MC), and IL-6 antibody (MAB2061) were purchased from R&D Systems (Minneapolis, MN). Recombinant human RANKL (Catalog no. 310-01) was purchased from Peprotech (Cranbury, NJ). Rabbit anti-Cathepsin B (Catalog no.), p-TAK1 Thr<sup>184/187</sup> (Catalog no.), MITF (Catalog no.), p-Stat-3 (Tyr<sup>705</sup>) (Catalog no. 9145), p-Stat-3 (Ser<sup>727</sup>) (Catalog no. 9134), TRAF6 (Catalog no.8028) MC-SF receptor (Catalog no. 3152), MyD88 (Catalog no. 4283) p-Jak1 (Tyr<sup>1034/1035</sup>) (Catalog no.0411. 3331) p-Jak2 (Tyr<sup>1007/1008</sup>) (Catalog no. 3776), p-Akt (Ser<sup>473</sup>) (Catalog no. 4060) p-NF-κBp65 (Ser<sup>536</sup>) (Catalog no. 3033) anti-rabbit, and anti-mouse horseradish peroxidase-linked secondary antibodies were purchased from Cell Signaling Technology (Danvers, MA). Anti-OPG (Catalog no. sc-390518), RANKL (Catalog no. sc-377079), Ets2 (Catalog no. sc-365666), Cathepsin K (Catalog no. sc-48353), TAK1 (Catalog no. sc-166562), TRAP (Catalog no. sc-376875), PU.1 (Catalog no. sc-390405), Stat3 (Catalog no. sc-8019), KLF (Catalog no. sc-166238), Oct4 (Catalog no. sc-365509), Podoplanin (Catalog no. sc-376695), Nanog (Catalog no. sc-134218), UCHL5 (Catalog no. sc-98673), Sox2 (Catalog no. sc-365964) β-actin (Catalog no. sc-47778), USP14 (Catalog no. sc-398009) and anti-gp130 antibody (Catalog no. sc-376280) were purchased from Santa Cruz Biotech (Santa Cruz, CA). Rabbit monoclonal p-IRAK1 (Thr<sup>209</sup>) (Catalog no. SAB4504246) was purchased from Sigma (St. Louis, MO). Anti-OSCAR antibody (Cat# MBS2090644) was purchased from MyBioSource (San Diego, CA).

**Flow Cytometry.**Flow cytometry was performed to verify RASF cell lines were free from monocyte contamination. Briefly, 3 independent RASFs from different human subject along with human PBMC cells were washed with PBS-based FACS buffer containing 2% fetal bovine serum and 1mM EDTA. All cells were Fc blocked using Biolegend FcX (422302) per the manufacturer's instructions. Blocked cells were

then washed with FACS buffer and stained in primary anti-CD14 antibody (325602) for 30 minutes. Stained cells were washed again followed by secondary staining with Invitrogen AlexaFluor 488 (A-21202) for 30 minutes. Secondary stained cells were washed again followed by Live/Dead staining with 7AAD (420404) for 10 minutes, washed a final time and flow cytometry was performed using a Beckman-Coulter Gallios flow cytometer. Analysis was performed using Kaluza Analysis software version 2.1.2.

**Small interfering RNA.** Small interfering RNA (siRNA) sequences for Ets2 were purchased from Millipore Sigma (eMISSION predesigned siRNA sequences SASI\_Hs01\_00130873 and SASI\_Hs01\_00130872). RASFs were transfected with 100 pmol of scramble (SIC001) and Ets2 siRNA with Lipofectamine 2000 (Thermo Fisher Scientific, Waltham, MA, USA) as per manufacturer instruction. Cells were grown in complete RPMI medium with or without 100ng/ml IL6 +100ng/ml IL6R for 12 days. To maintain continuous knockdown while differentiation of RASFs every transfection step was repeated on consecutive 3 times on day 3, 6 and 9. On day 11 of transfection, RASFs were serum starved overnight along with 100ng/ml IL6 +100ng/ml IL6R simulation for overnight.

**Gelatin Zymography:** Cell supernatant from MCSF+RANKL, IL6+IL6R and MCSF+RANKL+IL6+IL6R from 12 day differentiated fibroblast were subjected to gelatin zymography using Novex gel (cat: Zy00100BOX) from Invitrogen as per manufacturer instruction. MMP2 bands were photographed using the Bio-Rad XRS system.

**Pit formation assay analysis:** For analysis of the pit in the calcium phosphate coated plate used image-J Fiji software which is freely available from the NIH. briefly we have a pit (which is stained with toluidine blue for the visibility) we draw a random boundary based on the pit area for bigger or smaller or any size which we can see blue color we drew hands free lines. We added all the area (size of area in field) from all the hand drawn pit outlines and divided it from overall size of the field (that gives us total blue area in overall field which is also proportional to cumulative of pit area and multiplied by 100 to get percentage value. We repeated this at least in an N-9 independent field to get % of pit relative to each other.

**Western Immunoblotting.** To study the effect on RASF differentiation and phenotypic switch, the whole-cell extracts were prepared using RIPA buffer (50 mM Tris pH 7.6, 150 mM NaCl, 1% Triton X100, 1mM EDTA, 0.5% sodium deoxycholate, 0.1% SDS) containing Complete mini-protease inhibitor and Phospho-Stop tablets (Roche, Indianapolis, IN). The amount of protein was measured using the Bio-Rad DC method (Bio-Rad, CA). Equal amounts of protein (25  $\mu$ g) were loaded and separated by SDS-polyacrylamide gel electrophoresis and transferred onto PVDF membranes (EMD Millipore). Blots were probed using respective primary blots followed by strip and re-probed for other primary antibodies or  $\beta$ -actin as an endogenous control. Densitometric analysis of the relative expression of each protein was done as described earlier (22). For determining soluble proteins, the Western blotting was performed on the conditioned media collected from the treated samples at different time points and concentrated 500  $\mu$ L using a 3-kDa cutoff Amicon filters (Millipore).

**Chromatin immunoprecipitation assay (ChIP).** Human RASFs crosslinking was performed by adding formaldehyde to a final concentration of 1% at room temperature for 10 minutes, and the reaction stopped by the addition of 125 mM glycine. Cells were washed with ice-cold phosphate-buffered saline containing 0.1 mM PMSF. Cell pellet was resuspended in 1 mL of ChIP sonication buffer (50 mM Tris-HCl, pH 8, 1% Triton X-100, 0.5% Deoxycholate, 150 mM NaCl, 1 mM EDTA, 0.3% SDS, Complete mini and Phos STOP protease inhibitors) and placed on ice for 30 minutes. DNA was sheared by sonication, and the cell debris was pelleted by centrifugation at 15,000 g for 15 minutes. Forty  $\mu$ l of clear lysate was taken out to check quality controls of sonication. Sonication quality was checked on an agarose gel, and leftovers were stored as input for further use. The supernatant was collected and pre-cleared with 50  $\mu$ l of Protein G Sepharose (Roche, IN) equilibrated with Baker's Yeast tRNA (Sigma) for 60 minutes at 4 °C. The pre-cleared

whole-cell extract was equally divided into three parts and three times diluted in Chip dilution buffer (Chip Sonication buffer without SDS). The diluted samples were incubated with 5 µg of Ets2 or IgG antibody at 4° C overnight. 10% of the volume was frozen and kept aside as input. The immune complex was precipitated by incubation of the samples with 50µl Protein G Sepharose equilibrated with tRNA at 4 °C for 4 hours. The samples were centrifuged at 500 g at 4 °C for 1 minute, and the supernatant was discarded. The Protein G Sepharose beads were washed with cold ChIP dilution buffer containing protease inhibitors followed by a wash with low salt wash buffer (1% TritonX-100, 0.1% sodium deoxycholate, 50 mM Tris pH 8.0, 150 mM NaCl and 5 mM EDTA), high salt wash buffer (1% Triton X-100, 0.1% sodium deoxycholate, 50 mM Tris pH 8.1, 500 mM NaCl and 5 mM EDTA), LiCl wash buffer (0.25 M LiCl, 0.5% Triton X100, 0.5% sodium deoxycholate, 1 mM EDTA and 10 mM Tris pH 8.1) and finally with 1X TE pH 8.

The immune complex was eluted with 1% SDS, 0.1 M NaHCO<sub>3</sub>. Crosslinking was reversed by incubating at 65°C overnight with 2µg RNase A followed by 2 hours of 5µl proteinase K (20 mg/mL) treatment at 65°C. After Proteinase K digestion, immunoprecipitated DNA was subjected to ethanol precipitation overnight at -20°C. Extracted DNA was further purified using a PCR purification column (Qiagen). PCR was performed using corresponding distal, mid, and proximal sequences to Cathepsin K and Cathepsin B gene promoters. IDT and the sequences of the synthesized primers are listed in Table S1. Additionally preliminary bioinformatics analysis was performed on CTSK and CTSS promoter by generating track hubs for the chip datasets which are available at <http://www.ag-rehli.de>. GSE31621 from NCBI GEO data were used for template to generate track.

**Untargeted proteomics of RASFs.** Two µl of the sample (~100 ng/µl protein) was injected into a 100 µm ID Integragrit trap (New Objective) packed with Repronil-Pur C18-AQ 120 Å 5 µm

material to a bed length of 2.5 cm at a flow rate of 2  $\mu\text{L}/\text{min}$ . After loading and desalting for 10 min with 0.1% formic acid plus 2% acetonitrile, the trap was brought in-line with a pulled fused-silica capillary tip (75- $\mu\text{m}$  i.d.) packed with 35 cm of Reprosil-Pur C18-AQ 120  $\text{\AA}$  5  $\mu\text{m}$ . Peptides were separated using a linear gradient from 5-30% solvent B (0.1 % formic acid in acetonitrile) in 90 min at a flow rate of 300  $\text{L}/\text{min}$ . The column temperature was maintained at a constant 50  $^{\circ}\text{C}$  during all experiments. Peptides were detected using the data-dependent acquisition (DDA) method. Survey scans of peptide precursors were performed in the Orbitrap mass analyzer from 375 to 1575  $m/z$  at 120K resolution (at 200  $m/z$ ) with a  $7 \times 10^5$  ion count target a maximum injection time of 50 ms. The instrument was set to run in full speed mode with a 3-sec cycle for the survey and the MS/MS scans. Higher-energy collisional dissociation (HCD) fragmentation was applied with a normalized collision energy of 30%. Resulting fragments were detected in the Orbitrap mass analyzer at 30 K resolution (at 200  $m/z$ ) with a  $1 \times 10^4$  ion count target and a maximum injection time of 100 ms. The dynamic exclusion was set to 30 s with a 20 ppm mass tolerance around the precursor and its isotopes.

For untargeted proteomics profiling, tandem mass spectra were analyzed using a variety of bioinformatics tools. All the raw data were converted to mzXML files for database searching and further analyzed by Trans-Proteomic Pipeline using PeptideProphet (Comet), iProphet, Protein Prophet, and StPeter. A target protein database was created by using the UniProt human database. All searches were configured to use a variable modification of methionine oxidation and carbamidomethylation of cysteine as a fixed modification. The results were filtered to a less than 1% protein false discovery rate (FDR) with the requirement for a minimum of one signature peptide per reported protein. The parameters used include: i) minimum peptide length of 6 amino acid, ii) maximum FDR of 1% and protein identification probability more than 0.85, iii) minimum

unique peptides per protein of 1, and modifications to cysteine or methionine were not considered distinct from the unmodified peptides and, iv) tryptic digestion with maximum of two miscleavages allowed. STRING was used for pathway analysis.

**Animal experiments.** Five wild type control C57BL/6 female mice (8-week-old) were provided by Washington State University animal care facility at Spokane, WA. Briefly, animals were euthanized by CO<sub>2</sub> asphyxiation followed by which hind limbs were harvested and stored in PBS solution. Before pursuing cell isolation from tibia and femur bone were soaked with 70% ethanol for 2-3 minutes followed by cutting of ends using a surgical grade scissors. Bone marrow was flushed out using a 25-gauge needle using PBS in a sterile tube containing penicillium-streptomycin containing RPMI without serum. Collected cells were dispersed using 5 ml pipettes followed by ficoll density centrifugation at 400 g rpm in a swinging bucket rotor. Further buffy phases containing all mononuclear suspension cells were collected using 10 ml pipette. Cells were further washed 2 to 3 times in plain RPMI-1640 and counted before proceeding to various treatments as mentioned in the method section for *Cell culture and stimulation*.

To determine protein expression in rat inflammatory arthritis, joint homogenates were considered from our previously published study [DOI: 10.1002/art.39447] for only naïve and adjuvant-induced arthritis (AIA) joint homogenates to be used for determining the expression levels of CTSB, CTSK, RANKL, Ets2 and  $\beta$ -actin.

## SUPPLEMENTARY TABLES

**Table 1:** Sequence of primer pair for CTSB, CTSK and Ets2 respective to Transcription start site

|                                   |  |  |                                   |  |  |
|-----------------------------------|--|--|-----------------------------------|--|--|
| <b>CTSB Primers -242 to -359</b>  |  |  | <b>CTSB Primers +14 to +154</b>   |  |  |
| <b>F1:</b> TCCTCAGTTCCTCGGGTATCC  |  |  | <b>F2:</b> TTAGTAGAGACGGGGTTTCACC |  |  |
| <b>R1:</b> GTACTCCCGCCTGGTTAGTAAC |  |  | <b>R2:</b> GGCGACAGTAAGAAGGCAGTAG |  |  |
|                                   |  |  |                                   |  |  |
| <b>CTSK Primers +39 to -99</b>    |  |  | <b>CTSK Primers -232 to -333</b>  |  |  |
| <b>F1:</b> AGAAACACTGCAAATCCACTGC |  |  | <b>F2:</b> TCCTAACAGGAAAGGGTAGGA  |  |  |
| <b>R1:</b> TTTATTCCATCGGGATTGCGGA |  |  | <b>R2:</b> AAAAGGAAGGACACAGCCCTAG |  |  |
|                                   |  |  |                                   |  |  |
| <b>ETS2 Primers -24 to -220</b>   |  |  | <b>ETS2 Primers -397 to -240</b>  |  |  |
| <b>F1:</b> CTCCGAGAGTGACGATGATGTG |  |  | <b>F2:</b> CATGGACTCAAGCACCTTCTGA |  |  |
| <b>R1:</b> CGCTTCCTGTAGAAACCGGG   |  |  | <b>R2:</b> CACAGGTGGGAACCTTA      |  |  |

**Table S2:** Secretome of RASFs in response to NS, MCSF+RANKL (M/R), IL-6/IL-6R and MCSF+RANKL+IL6+IL6R (M/R/IL-6/IL-6R)

| NS               | M/R              | IL-6/IL-6R       | M/R/IL-6/IL-6R   |
|------------------|------------------|------------------|------------------|
| A0A024R6I7_HUMAN | A0A024R6I7_HUMAN | 3HAO_HUMAN       | A0A024R6I7_HUMAN |
| A0A087WTA8_HUMAN | A0A087WSY5_HUMAN | A0A087WTA8_HUMAN | A0A087WTA8_HUMAN |
| A0A087WWT3_HUMAN | A0A087WTA8_HUMAN | A0A087WWT3_HUMAN | A0A087WWT3_HUMAN |
| A0A087WXH5_HUMAN | A0A087WW88_HUMAN | A0A087WYF1_HUMAN | A0A087WZP6_HUMAN |
| A0A087WYC1_HUMAN | A0A087WWQ4_HUMAN | A0A087WYV8_HUMAN | A0A087X0S5_HUMAN |
| A0A087WYF1_HUMAN | A0A087WWT3_HUMAN | A0A087X054_HUMAN | A0A0A0MQX7_HUMAN |
| A0A087X0S5_HUMAN | A0A087WYX9_HUMAN | A0A087X0S5_HUMAN | A0A0A0MS08_HUMAN |
| A0A087X1S9_HUMAN | A0A087X0S5_HUMAN | A0A0A0MS08_HUMAN | A0A0A0MT01_HUMAN |
| A0A087X1T7_HUMAN | A0A087X1T7_HUMAN | A0A0A0MT01_HUMAN | A0A0A0MTC7_HUMAN |
| A0A0A0MQS9_HUMAN | A0A0A0MQS9_HUMAN | A0A0A0MTC7_HUMAN | A0A0B4J231_HUMAN |
| A0A0A0MQX7_HUMAN | A0A0A0MQX7_HUMAN | A0A0B4J1R6_HUMAN | A0A0G2JMB2_HUMAN |
| A0A0A0MS08_HUMAN | A0A0A0MS08_HUMAN | A0A0C4DF50_HUMAN | A0A0G2JPA8_HUMAN |
| A0A0A0MT01_HUMAN | A0A0A0MT01_HUMAN | A0A0C4DG90_HUMAN | A0A0U1RQF0_HUMAN |
| A0A0B4J231_HUMAN | A0A0B4J231_HUMAN | A0A0D9SFB5_HUMAN | A0A0U1RQV3_HUMAN |
| A0A0G2JMB2_HUMAN | A0A0G2JMB2_HUMAN | A0A0G2JMB2_HUMAN | A0A140TA49_HUMAN |
| A0A0G2JPA8_HUMAN | A0A0G2JPA8_HUMAN | A0A0G2JPA8_HUMAN | A0A1B0GUU9_HUMAN |
| A0A0U1RQK7_HUMAN | A0A0U1RQK7_HUMAN | A0A0G2JS28_HUMAN | A0A286YES1_HUMAN |
| A0A0U1RQV3_HUMAN | A0A0U1RQV3_HUMAN | A0A0U1RQF0_HUMAN | A0A286YEV1_HUMAN |

| NS               | M/R              | IL-6/IL-6R       | M/R/IL-6/IL-6R   |
|------------------|------------------|------------------|------------------|
| A0A140TA49_HUMAN | A0A140TA49_HUMAN | A0A140TA49_HUMAN | A0A286YEY4_HUMAN |
| A0A1W2PS52_HUMAN | A0A1B0GTX1_HUMAN | A0A1B0GUU9_HUMAN | A0A286YFJ8_HUMAN |
| A0A286YES1_HUMAN | A0A1B0GWE8_HUMAN | A0A1B0GW33_HUMAN | A0A2Q2TTZ9_HUMAN |
| A0A286YEY1_HUMAN | A0A1X7SC65_HUMAN | A0A1B0GWE8_HUMAN | A0A2R8Y7C0_HUMAN |
| A0A286YEY4_HUMAN | A0A286YES1_HUMAN | A0A286YES1_HUMAN | A0A3B3IS80_HUMAN |
| A0A286YFJ8_HUMAN | A0A286YEY1_HUMAN | A0A286YEY1_HUMAN | A0A3B3IT64_HUMAN |
| A0A2Q2TTZ9_HUMAN | A0A286YEY4_HUMAN | A0A286YEY4_HUMAN | A0A3B3ITK0_HUMAN |
| A0A2R8Y7C0_HUMAN | A0A286YFJ8_HUMAN | A0A286YFJ8_HUMAN | A1AG1_HUMAN      |
| A0A2R8YGX3_HUMAN | A0A2R8Y7C0_HUMAN | A0A2Q2TTZ9_HUMAN | A1AG2_HUMAN      |
| A0A3B3IS80_HUMAN | A0A2R8YCLO_HUMAN | A0A2R8Y6G6_HUMAN | A1AT_HUMAN       |
| A0A3B3ITK0_HUMAN | A0A2R8YGD1_HUMAN | A0A2R8Y793_HUMAN | A1BG_HUMAN       |
| A1AG1_HUMAN      | A0A3B3ISX9_HUMAN | A0A2R8YGD1_HUMAN | A2GL_HUMAN       |
| A1AG2_HUMAN      | A0A3B3ITK0_HUMAN | A0A3B3IS80_HUMAN | A2MG_HUMAN       |
| A1AT_HUMAN       | A0A3B3IU93_HUMAN | A0A3B3ITK0_HUMAN | A6NIW5_HUMAN     |
| A1BG_HUMAN       | A1AG1_HUMAN      | A1AG1_HUMAN      | A8MUN2_HUMAN     |
| A2GL_HUMAN       | A1AG2_HUMAN      | A1AG2_HUMAN      | ADH1A_HUMAN      |
| A2MG_HUMAN       | A1AT_HUMAN       | A1AT_HUMAN       | AFAM_HUMAN       |
| A6XND1_HUMAN     | A1BG_HUMAN       | A1BG_HUMAN       | ALBU_HUMAN       |
| AACT_HUMAN       | A2GL_HUMAN       | A2GL_HUMAN       | AMBP_HUMAN       |
| ACTG_HUMAN       | A2MG_HUMAN       | A2MG_HUMAN       | ANGT_HUMAN       |
| ACTN4_HUMAN      | A6XND1_HUMAN     | A6NIW5_HUMAN     | ANT3_HUMAN       |
| AFAM_HUMAN       | A8MUN2_HUMAN     | A8MUN2_HUMAN     | APOH_HUMAN       |
| ALBU_HUMAN       | A8MXR1_HUMAN     | AACT_HUMAN       | ATRN_HUMAN       |
| AMBP_HUMAN       | ACTG_HUMAN       | ACO13_HUMAN      | ATS1_HUMAN       |
| AMPN_HUMAN       | ACTN4_HUMAN      | ADAM8_HUMAN      | BOYJC5_HUMAN     |
| ANC2_HUMAN       | AFAM_HUMAN       | ADH1A_HUMAN      | B1AHL2_HUMAN     |
| ANGT_HUMAN       | ALBU_HUMAN       | ADHX_HUMAN       | B2MG_HUMAN       |
| ANT3_HUMAN       | AMBP_HUMAN       | AFAM_HUMAN       | B4DPQ0_HUMAN     |
| ANXA5_HUMAN      | AMPN_HUMAN       | AL1A1_HUMAN      | B4E1Z4_HUMAN     |
| APOB_HUMAN       | ANGT_HUMAN       | AL1L1_HUMAN      | B5MCZ3_HUMAN     |
| APOH_HUMAN       | ANT3_HUMAN       | AL4A1_HUMAN      | B7WNR0_HUMAN     |
| ATL3_HUMAN       | ANXA1_HUMAN      | ALAT1_HUMAN      | B7WPK3_HUMAN     |
| ATRN_HUMAN       | ANXA5_HUMAN      | ALBU_HUMAN       | BGH3_HUMAN       |
| ATS1_HUMAN       | APOA1_HUMAN      | ALDH2_HUMAN      | C1S_HUMAN        |
| BOYJC4_HUMAN     | APOH_HUMAN       | AMBP_HUMAN       | C9IJZ6_HUMAN     |
| B1AHL2_HUMAN     | AT2B4_HUMAN      | ANGT_HUMAN       | C9JXI5_HUMAN     |
| B1AP58_HUMAN     | ATL3_HUMAN       | ANT3_HUMAN       | C9JXX4_HUMAN     |
| B2MG_HUMAN       | ATRN_HUMAN       | ANXA5_HUMAN      | CAD13_HUMAN      |
| B4DPQ0_HUMAN     | BOYJC4_HUMAN     | AOFB_HUMAN       | CATB_HUMAN       |
| B4E1Z4_HUMAN     | B1AHL2_HUMAN     | AOXA_HUMAN       | CATL1_HUMAN      |



| NS           | M/R          | IL-6/IL-6R   | M/R/IL-6/IL-6R |
|--------------|--------------|--------------|----------------|
| B7ZKJ8_HUMAN | B1AP58_HUMAN | APOH_HUMAN   | CD109_HUMAN    |
| BASP1_HUMAN  | B2MG_HUMAN   | ARGI1_HUMAN  | CFAH_HUMAN     |
| BGH3_HUMAN   | B4DNG0_HUMAN | ARK73_HUMAN  | CH3L1_HUMAN    |
| BIP_HUMAN    | B4DPQ0_HUMAN | ASSY_HUMAN   | CH3L2_HUMAN    |
| BRWD1_HUMAN  | B4E1Z4_HUMAN | ATL3_HUMAN   | CH60_HUMAN     |
| C1S_HUMAN    | B7WNRO_HUMAN | ATRN_HUMAN   | CLUS_HUMAN     |
| C9J879_HUMAN | BASP1_HUMAN  | ATS1_HUMAN   | CO1A1_HUMAN    |
| C9JBF1_HUMAN | BGH3_HUMAN   | B0YJC4_HUMAN | CO3_HUMAN      |
| C9JFR7_HUMAN | BTD_HUMAN    | B1AH49_HUMAN | CO3A1_HUMAN    |
| C9JG63_HUMAN | C1S_HUMAN    | B1AHL2_HUMAN | CO5A1_HUMAN    |
| C9JIZ6_HUMAN | C9JIZ6_HUMAN | B2MG_HUMAN   | CO6A2_HUMAN    |
| C9JQS6_HUMAN | C9JYX9_HUMAN | B4DPQ0_HUMAN | CSF1-3_HUMAN   |
| C9JXI5_HUMAN | CAD13_HUMAN  | B4E1Z4_HUMAN | CYTC_HUMAN     |
| C9JXX4_HUMAN | CALU_HUMAN   | B5MCZ3_HUMAN | D6RF35_HUMAN   |
| CAD13_HUMAN  | CATA_HUMAN   | B7WNRO_HUMAN | D6RGG3_HUMAN   |
| CALU_HUMAN   | CATB_HUMAN   | B7WPK3_HUMAN | DNER_HUMAN     |
| CATB_HUMAN   | CATK_HUMAN   | BIP_HUMAN    | E5RJH0_HUMAN   |
| CATL1_HUMAN  | CATL1_HUMAN  | C1RL_HUMAN   | E7ER44_HUMAN   |
| CATZ_HUMAN   | CATZ_HUMAN   | C1S_HUMAN    | E7ET33_HUMAN   |
| CD109_HUMAN  | CBPQ_HUMAN   | C9J2C0_HUMAN | E7EUF1_HUMAN   |
| CH3L1_HUMAN  | CC180_HUMAN  | C9JDL1_HUMAN | E9PC41_HUMAN   |
| CLUS_HUMAN   | CD109_HUMAN  | C9JH92_HUMAN | E9PF17_HUMAN   |
| CO1A1_HUMAN  | CH3L1_HUMAN  | C9JIZ6_HUMAN | E9PGN7_HUMAN   |
| CO3_HUMAN    | CLUS_HUMAN   | C9JXI5_HUMAN | E9PHK0_HUMAN   |
| CO3A1_HUMAN  | CN183_HUMAN  | C9JXX4_HUMAN | ECM1_HUMAN     |
| CO5_HUMAN    | CO1A1_HUMAN  | CATA_HUMAN   | ERN1_HUMAN     |
| CO6A2_HUMAN  | CO3_HUMAN    | CATB_HUMAN   | F5GXS0_HUMAN   |
| CSPG2_HUMAN  | CO3A1_HUMAN  | CATL1_HUMAN  | F5GYU2_HUMAN   |
| CSTN1_HUMAN  | CO5A1_HUMAN  | CH3L1_HUMAN  | F5H4R2_HUMAN   |
| CTGF_HUMAN   | CO6A2_HUMAN  | CH3L2_HUMAN  | F8VRR2_HUMAN   |
| CYR61_HUMAN  | CSF1-3_HUMAN | CH60_HUMAN   | F8W696_HUMAN   |
| CYTC_HUMAN   | CSPG2_HUMAN  | CLUS_HUMAN   | F8W914_HUMAN   |
| D6RAR4_HUMAN | CSTN1_HUMAN  | CO1A1_HUMAN  | FBN1_HUMAN     |
| D6RF35_HUMAN | CTGF_HUMAN   | CO3_HUMAN    | FETUA_HUMAN    |
| D6RF94_HUMAN | CYTC_HUMAN   | CO3A1_HUMAN  | FETUB_HUMAN    |
| D6RGG3_HUMAN | D6RB01_HUMAN | CO5A1_HUMAN  | FINC_HUMAN     |
| DAG1_HUMAN   | D6RF35_HUMAN | CO6A2_HUMAN  | FSTL1_HUMAN    |
| DC8L2_HUMAN  | D6RF94_HUMAN | CPSM_HUMAN   | G3V3A0_HUMAN   |
| E7ENL6_HUMAN | D6RGG3_HUMAN | CXCL7_HUMAN  | G3XA12_HUMAN   |
| E7ER44_HUMAN | DAG1_HUMAN   | CYTC_HUMAN   | G3XAM2_HUMAN   |

| NS           | M/R          | IL-6/IL-6R   | M/R/IL-6/IL-6R |
|--------------|--------------|--------------|----------------|
| E7ET33_HUMAN | DC8L2_HUMAN  | D6RAM7_HUMAN | G3XAP6_HUMAN   |
| E7EUF1_HUMAN | E7ENL6_HUMAN | D6RD47_HUMAN | G5EA25_HUMAN   |
| E9PG08_HUMAN | E7ER44_HUMAN | D6RF35_HUMAN | GDN_HUMAN      |
| E9PHK0_HUMAN | E7ET33_HUMAN | D6RF94_HUMAN | H0Y3T6_HUMAN   |
| E9PIT3_HUMAN | E7EUF1_HUMAN | D6RGG3_HUMAN | H0Y875_HUMAN   |
| E9PKP4_HUMAN | E9PD24_HUMAN | DC8L2_HUMAN  | H0Y9C9_HUMAN   |
| E9PR70_HUMAN | E9PFZ2_HUMAN | DHE3_HUMAN   | H0YAC1_HUMAN   |
| ECM1_HUMAN   | E9PG08_HUMAN | E5RFV2_HUMAN | H0YBX3_HUMAN   |
| ERN1_HUMAN   | E9PHK0_HUMAN | E5RJH0_HUMAN | H0YDL9_HUMAN   |
| F5H4R2_HUMAN | E9PHW4_HUMAN | E7ENL6_HUMAN | H0YDX6_HUMAN   |
| F8VRR2_HUMAN | E9PIT3_HUMAN | E7ER44_HUMAN | H0YHM6_HUMAN   |
| F8VYK9_HUMAN | E9PNW4_HUMAN | E7ET33_HUMAN | H0YL56_HUMAN   |
| F8W696_HUMAN | E9PPB3_HUMAN | E7EUC7_HUMAN | H0YMF1_HUMAN   |
| F8W809_HUMAN | E9PRS3_HUMAN | E7EUF1_HUMAN | H0YN42_HUMAN   |
| F8W914_HUMAN | ECM1_HUMAN   | E7EUT5_HUMAN | H3BS10_HUMAN   |
| F8WD96_HUMAN | F5GX75_HUMAN | E9PC41_HUMAN | H7C0L5_HUMAN   |
| F8WF14_HUMAN | F5GXJ9_HUMAN | E9PF17_HUMAN | H7C1J8_HUMAN   |
| FABPL_HUMAN  | F5H4R2_HUMAN | E9PF18_HUMAN | H7C4N8_HUMAN   |
| FBN1_HUMAN   | F5H4V9_HUMAN | E9PG08_HUMAN | H7C5R1_HUMAN   |
| FETUA_HUMAN  | F8VRR2_HUMAN | E9PHK0_HUMAN | HBB_HUMAN      |
| FINC_HUMAN   | F8W914_HUMAN | E9PIT3_HUMAN | HEMO_HUMAN     |
| FRIL_HUMAN   | F8WAD8_HUMAN | E9PKP4_HUMAN | HMCN1_HUMAN    |
| FSTL1_HUMAN  | F8WBI9_HUMAN | ECHM_HUMAN   | HPT_HUMAN      |
| G3XAI2_HUMAN | F8WE65_HUMAN | ECM1_HUMAN   | I3L4N8_HUMAN   |
| G3XAM2_HUMAN | FAM3C_HUMAN  | EF2_HUMAN    | IBP4_HUMAN     |
| G3XAP6_HUMAN | FBLN1_HUMAN  | ERN1_HUMAN   | IBP6_HUMAN     |
| G5E9R7_HUMAN | FBLN2_HUMAN  | EST1_HUMAN   | IBP7_HUMAN     |
| GAS6_HUMAN   | FBN1_HUMAN   | F2Z349_HUMAN | IGKC_HUMAN     |
| GDN_HUMAN    | FETUA_HUMAN  | F2Z3J9_HUMAN | IGLC3_HUMAN    |
| GGH_HUMAN    | FINC_HUMAN   | F5GXS0_HUMAN | IL6RA_HUMAN    |
| H0Y2X5_HUMAN | FRAS1_HUMAN  | F5GYU2_HUMAN | ISLR_HUMAN     |
| H0Y3T6_HUMAN | FSTL1_HUMAN  | F5H2F4_HUMAN | J3KMX3_HUMAN   |
| H0YAC1_HUMAN | G3V595_HUMAN | F5H4R2_HUMAN | J3KMY5_HUMAN   |
| H0YDL9_HUMAN | G3V5P6_HUMAN | F6SYF8_HUMAN | J3KQ18_HUMAN   |
| H0YDW7_HUMAN | G3XAI2_HUMAN | F8VRR2_HUMAN | J3QSU6_HUMAN   |
| H0YFL7_HUMAN | G3XAP6_HUMAN | F8VZY9_HUMAN | K1C10_HUMAN    |
| H0YHM6_HUMAN | GAS6_HUMAN   | F8W1U3_HUMAN | K1C9_HUMAN     |
| H0YN42_HUMAN | GDN_HUMAN    | F8W696_HUMAN | K22E_HUMAN     |
| H3BS10_HUMAN | H0Y3T6_HUMAN | F8W8W4_HUMAN | K2C1_HUMAN     |
| H3BT58_HUMAN | H0YAC1_HUMAN | F8W914_HUMAN | K7EKZ5_HUMAN   |

| NS           | M/R          | IL-6/IL-6R   | M/R/IL-6/IL-6R |
|--------------|--------------|--------------|----------------|
| H7BYH4_HUMAN | HOYCE2_HUMAN | F8W978_HUMAN | K7ENL6_HUMAN   |
| H7C543_HUMAN | HOYD18_HUMAN | F8WE65_HUMAN | K7ERG9_HUMAN   |
| H7C5R1_HUMAN | HOYDW7_HUMAN | FABPL_HUMAN  | KIF4A_HUMAN    |
| HBB_HUMAN    | HOYFL7_HUMAN | FBLN3_HUMAN  | KNG1-3_HUMAN   |
| HEMO_HUMAN   | HOYH80_HUMAN | FBN1_HUMAN   | LAMC1_HUMAN    |
| HEP2_HUMAN   | HOYMJ5_HUMAN | FETUA_HUMAN  | LG3BP_HUMAN    |
| HMCN1_HUMAN  | HOYN42_HUMAN | FINC_HUMAN   | LRP1B_HUMAN    |
| HMCN2_HUMAN  | H3BR81_HUMAN | FSTL1_HUMAN  | LRP8_HUMAN     |
| HPT_HUMAN    | H3BS10_HUMAN | FUMH_HUMAN   | LUM_HUMAN      |
| HPTR_HUMAN   | H7BYH4_HUMAN | G3V1A4_HUMAN | MEG10_HUMAN    |
| HSP76_HUMAN  | H7C0L5_HUMAN | G3XAI2_HUMAN | MFAP1_HUMAN    |
| IBP4_HUMAN   | H7C0V9_HUMAN | G3XAM2_HUMAN | MMP2_HUMAN     |
| IBP7_HUMAN   | H7C1J5_HUMAN | G3XAP6_HUMAN | NOTC2_HUMAN    |
| IC1_HUMAN    | H7C5Q1_HUMAN | G5E9S2_HUMAN | NTF3_HUMAN     |
| IDS_HUMAN    | HBB_HUMAN    | GDN-3_HUMAN  | NUCB1_HUMAN    |
| IGKC_HUMAN   | HBD_HUMAN    | GPDA_HUMAN   | PAI1_HUMAN     |
| IGLC3_HUMAN  | HEMO_HUMAN   | GSTA3_HUMAN  | PCOC1_HUMAN    |
| ISLR_HUMAN   | HEP2_HUMAN   | HOY3T6_HUMAN | PEDF_HUMAN     |
| J3KMX3_HUMAN | HMCN1_HUMAN  | HOY532_HUMAN | PGRP2_HUMAN    |
| J3KMY5_HUMAN | HPT_HUMAN    | HOY6I0_HUMAN | PGS1_HUMAN     |
| J3KQ18_HUMAN | HTRA1_HUMAN  | HOY875_HUMAN | PGS2_HUMAN     |
| J3KQJ1_HUMAN | IBP4_HUMAN   | HOY9B1_HUMAN | PI16_HUMAN     |
| J3KQJ9_HUMAN | IBP5_HUMAN   | HOYAC1_HUMAN | PPIB_HUMAN     |
| J3QSU6_HUMAN | IBP6_HUMAN   | HOYBX3_HUMAN | PRD10-6_HUMAN  |
| K1C10_HUMAN  | IBP7_HUMAN   | HOYCY6_HUMAN | PSB9_HUMAN     |
| K1C9_HUMAN   | IC1_HUMAN    | HOYDX6_HUMAN | PTX3_HUMAN     |
| K22E_HUMAN   | IGKC_HUMAN   | HOYI09_HUMAN | PZP_HUMAN      |
| K2C1_HUMAN   | IGLC3_HUMAN  | HOYI37_HUMAN | Q4VY20_HUMAN   |
| K7EJB9_HUMAN | ISLR_HUMAN   | HOYLA4_HUMAN | Q5H9A7_HUMAN   |
| K7EKZ5_HUMAN | J3KMX3_HUMAN | HOYM31_HUMAN | Q5JPC9_HUMAN   |
| K7ERG9_HUMAN | J3KMY5_HUMAN | HOYMF1_HUMAN | Q5R211_HUMAN   |
| K7ES70_HUMAN | J3KNQ2_HUMAN | HOYN42_HUMAN | Q5SR54_HUMAN   |
| KNG1_HUMAN   | J3KSK3_HUMAN | H3BQZ9_HUMAN | Q5STZ8_HUMAN   |
| LAMC1_HUMAN  | J3QRJ3_HUMAN | H3BRN4_HUMAN | Q5T025_HUMAN   |
| LDHA_HUMAN   | J3QSU6_HUMAN | H3BRSO_HUMAN | Q5T985_HUMAN   |
| LEG1_HUMAN   | K1C10_HUMAN  | H3BS10_HUMAN | Q5URX0_HUMAN   |
| LGMN_HUMAN   | K22E_HUMAN   | H3BTX9_HUMAN | Q5VY30_HUMAN   |
| LRP1_HUMAN   | K2C1_HUMAN   | H7BYH4_HUMAN | Q96C32_HUMAN   |
| LUM_HUMAN    | K7EJB9_HUMAN | H7C402_HUMAN | Q96GW1_HUMAN   |
|              |              |              |                |

| NS            | M/R           | IL-6/IL-6R    | M/R/IL-6/IL-6R |
|---------------|---------------|---------------|----------------|
| LYAG_HUMAN    | K7EKL3_HUMAN  | H7C5R1_HUMAN  | QSOX1_HUMAN    |
| M0R2V7_HUMAN  | K7EKZ5_HUMAN  | H9KVB4_HUMAN  | SAP3_HUMAN     |
| M1BL1_HUMAN   | K7ENT6_HUMAN  | HBA_HUMAN     | SFRP4_HUMAN    |
| MASP1-4_HUMAN | K7EQQ3_HUMAN  | HBB_HUMAN     | SODE_HUMAN     |
| MIF_HUMAN     | K7ERG9_HUMAN  | HCD2_HUMAN    | SPRC_HUMAN     |
| MMP2_HUMAN    | KMT2C_HUMAN   | HEMO_HUMAN    | SRGN_HUMAN     |
| NEGR1_HUMAN   | KNG1_HUMAN    | HEP2_HUMAN    | STC2_HUMAN     |
| NOTC2_HUMAN   | LAMC1_HUMAN   | HINT1_HUMAN   | SYDE2_HUMAN    |
| NOTC3_HUMAN   | LDHA_HUMAN    | HMCS2_HUMAN   | THBG_HUMAN     |
| NUCB1_HUMAN   | LG3BP_HUMAN   | HPT_HUMAN     | TIMP2_HUMAN    |
| PAI1_HUMAN    | LGMN_HUMAN    | HSDL2_HUMAN   | TPIS_HUMAN     |
| PCOC1_HUMAN   | LRP1_HUMAN    | IBP4_HUMAN    | TPX2_HUMAN     |
| PCP_HUMAN     | LRP8_HUMAN    | IBP6_HUMAN    | TRFE_HUMAN     |
| PEBP1_HUMAN   | LUM_HUMAN     | IBP7_HUMAN    | TSP1_HUMAN     |
| PEDF_HUMAN    | MASP1-4_HUMAN | IC1_HUMAN     | TTHY_HUMAN     |
| PGBM_HUMAN    | MFGM_HUMAN    | IDHC_HUMAN    | USP9Y_HUMAN    |
| PGRP2_HUMAN   | MIF_HUMAN     | IDHP_HUMAN    | VASN_HUMAN     |
| PGS1_HUMAN    | MMP2_HUMAN    | IGKC_HUMAN    | VATA_HUMAN     |
| PGS2_HUMAN    | NAA16_HUMAN   | IGLC3_HUMAN   | VTNC_HUMAN     |
| PLBL2_HUMAN   | NEGR1_HUMAN   | INT11-4_HUMAN | X6R3G6_HUMAN   |
| PLMN_HUMAN    | NEUS_HUMAN    | IPSP_HUMAN    | ZA2G_HUMAN     |
| PPARD_HUMAN   | NP1L2_HUMAN   | ISLR_HUMAN    | ZFR_HUMAN      |
| PIIB_HUMAN    | NUCB1_HUMAN   | J3KMX3_HUMAN  |                |
| PROF1_HUMAN   | O60597_HUMAN  | J3KMY5_HUMAN  |                |
| PROZ_HUMAN    | PAI1_HUMAN    | J3KND8_HUMAN  |                |
| PTGDS_HUMAN   | PCOC1_HUMAN   | J3KQ18_HUMAN  |                |
| PTX3_HUMAN    | PCP_HUMAN     | J3QSU6_HUMAN  |                |
| PZP_HUMAN     | PEAK1_HUMAN   | K1C10_HUMAN   |                |
| Q4VY20_HUMAN  | PEBP1_HUMAN   | K1C9_HUMAN    |                |
| Q5H9A7_HUMAN  | PEDF_HUMAN    | K22E_HUMAN    |                |
| Q5JPC9_HUMAN  | PGBM_HUMAN    | K2C1_HUMAN    |                |
| Q5R211_HUMAN  | PGRP2_HUMAN   | K2C6B_HUMAN   |                |
| Q5T123_HUMAN  | PGS1_HUMAN    | K7EJ44_HUMAN  |                |
| Q5T985_HUMAN  | PGS2_HUMAN    | K7ERG9_HUMAN  |                |
| Q5URX0_HUMAN  | PI16_HUMAN    | KIF4A_HUMAN   |                |
| Q5VY30_HUMAN  | PLMN_HUMAN    | KNG1_HUMAN    |                |
| Q6L983_HUMAN  | PRELP_HUMAN   | KPYR_HUMAN    |                |
| Q96C32_HUMAN  | PROF1_HUMAN   | LAMC1_HUMAN   |                |
| QSOX1_HUMAN   | PROZ_HUMAN    | LAMC2_HUMAN   |                |
| S4R460_HUMAN  | PTGDS_HUMAN   | LG3BP_HUMAN   |                |

| NS           | M/R          | IL-6/IL-6R   | M/R/IL-6/IL-6R |
|--------------|--------------|--------------|----------------|
| SAHH2_HUMAN  | PTX3_HUMAN   | LMBD2_HUMAN  |                |
| SDC4_HUMAN   | PZP_HUMAN    | LRP8_HUMAN   |                |
| SFRP4_HUMAN  | Q4VY20_HUMAN | LUM_HUMAN    |                |
| SODE_HUMAN   | Q5H9A7_HUMAN | MOROF0_HUMAN |                |
| SOX6-2_HUMAN | Q5JPC9_HUMAN | MOR2B3_HUMAN |                |
| SPRC_HUMAN   | Q5JSG7_HUMAN | MEG10_HUMAN  |                |
| SRGN_HUMAN   | Q5T123_HUMAN | MMP2_HUMAN   |                |
| STC2_HUMAN   | Q5T321_HUMAN | MMSA_HUMAN   |                |
| TGON2_HUMAN  | Q5T7F0_HUMAN | NTF3_HUMAN   |                |
| THBG_HUMAN   | Q5T985_HUMAN | NUCB1_HUMAN  |                |
| THIO_HUMAN   | Q5URX0_HUMAN | ODBB_HUMAN   |                |
| TIMP2_HUMAN  | Q5VY30_HUMAN | PAI1_HUMAN   |                |
| TPIS_HUMAN   | Q96C32_HUMAN | PCOC1_HUMAN  |                |
| TRFE_HUMAN   | QSOX1_HUMAN  | PDIA3_HUMAN  |                |
| TSP1_HUMAN   | S4R460_HUMAN | PEDF_HUMAN   |                |
| TTHY_HUMAN   | SAP3_HUMAN   | PGBM_HUMAN   |                |
| TXND5_HUMAN  | SDC4_HUMAN   | PGRP2_HUMAN  |                |
| UBR3-2_HUMAN | SFRP4_HUMAN  | PGS1_HUMAN   |                |
| V9GYS1_HUMAN | SHQ1_HUMAN   | PGS2_HUMAN   |                |
| V9GZ57_HUMAN | SODE_HUMAN   | PPARD_HUMAN  |                |
| VASN_HUMAN   | SPRC_HUMAN   | PPIB_HUMAN   |                |
| VILL_HUMAN   | SRGN_HUMAN   | PRDX3_HUMAN  |                |
| VINC_HUMAN   | STC2_HUMAN   | PRDX6_HUMAN  |                |
| VNN1_HUMAN   | TGON2_HUMAN  | PSB2_HUMAN   |                |
| VTNC_HUMAN   | THBG_HUMAN   | PTX3_HUMAN   |                |
| X6R3G6_HUMAN | THIO_HUMAN   | Q4VY20_HUMAN |                |
| ZA2G_HUMAN   | TIE2_HUMAN   | Q5H9A7_HUMAN |                |
| ZC3H4_HUMAN  | TIMP2_HUMAN  | Q5JPC9_HUMAN |                |
|              | TPIS_HUMAN   | Q5JR01_HUMAN |                |
|              | TRFE_HUMAN   | Q5SR54_HUMAN |                |
|              | TSP1_HUMAN   | Q5T025_HUMAN |                |
|              | TTHY_HUMAN   | Q5T985_HUMAN |                |
|              | TWSG1_HUMAN  | Q5URX0_HUMAN |                |
|              | TYB4_HUMAN   | Q5VY30_HUMAN |                |
|              | V9GYM3_HUMAN | Q5VZC3_HUMAN |                |
|              | V9GZ57_HUMAN | Q5W0H4_HUMAN |                |
|              | VASN_HUMAN   | Q8IUN7_HUMAN |                |
|              | VILL_HUMAN   | Q96C32_HUMAN |                |
|              | VINC_HUMAN   | QSOX1_HUMAN  |                |
|              | VNN1_HUMAN   | S4R3C6_HUMAN |                |

| NS | M/R         | IL-6/IL-6R    | M/R/IL-6/IL-6R |
|----|-------------|---------------|----------------|
|    | VWF_HUMAN   | S4R3P0_HUMAN  |                |
|    | WISP2_HUMAN | SFRP4_HUMAN   |                |
|    | ZA2G_HUMAN  | SLU7_HUMAN    |                |
|    | ZC3H4_HUMAN | SNED1_HUMAN   |                |
|    |             | SODE_HUMAN    |                |
|    |             | SPRC_HUMAN    |                |
|    |             | SPT2_HUMAN    |                |
|    |             | SPYA_HUMAN    |                |
|    |             | STC2_HUMAN    |                |
|    |             | TGM2_HUMAN    |                |
|    |             | THBG_HUMAN    |                |
|    |             | THIL_HUMAN    |                |
|    |             | THIO_HUMAN    |                |
|    |             | TIG1_HUMAN    |                |
|    |             | TIMP2_HUMAN   |                |
|    |             | TPIS_HUMAN    |                |
|    |             | TPX2_HUMAN    |                |
|    |             | TRFE_HUMAN    |                |
|    |             | TSP1_HUMAN    |                |
|    |             | TTHY_HUMAN    |                |
|    |             | TVBX1_HUMAN   |                |
|    |             | U3KPR1_HUMAN  |                |
|    |             | V9GYG0_HUMAN  |                |
|    |             | V9HW50_HUMAN  |                |
|    |             | VASN_HUMAN    |                |
|    |             | VTNC_HUMAN    |                |
|    |             | WDFY4_HUMAN   |                |
|    |             | X6R3G6_HUMAN  |                |
|    |             | X6RBG4_HUMAN  |                |
|    |             | ZA2G_HUMAN    |                |
|    |             | ZN638-3_HUMAN |                |

**Table S3:** Top 10 molecular network predicted by IPA for IL-6/IL-6R secretome

| ID | Molecules in Network                                                                                                                                                                                                                                                                                                                               | Score | Focus Molecules | Top Diseases and Functions                                                                          |
|----|----------------------------------------------------------------------------------------------------------------------------------------------------------------------------------------------------------------------------------------------------------------------------------------------------------------------------------------------------|-------|-----------------|-----------------------------------------------------------------------------------------------------|
| 1  | 20s proteasome, ACOT13, B2M, CRYZ, DECR1, ECM1, EEF1A1, EEF2, FN1, GAPDH, GOLGA4,HSP, Hsp70, IFN Beta, Ifnar, JAK, LGALS3BP, mediator, MHC CLASS I (family), MHC Class II (complex), PPIB, PSAP, PSMA2, PSMB2, PTGR1, RNA polymerase II, Rnr, RPS23, RPS5, SNED1, SOD1, SPTY2D1, TKT, TPT1, Ubiquitin                                              | 39    | 23              | [Cancer, Organismal Injury and Abnormalities, Respiratory Disease]                                  |
| 2  | 7S NGF, AFM, Akt, ATRN, C1q, C1R, C1RL, C1S, CFI, Collagen type V, Collagen type VI, Complement, Complement component 1, CSPG, DCN, Hnf3, Igf, Igfbp, IGFBP4, IGFBP5, IGFBP6, IGFBP7, IGHG3, Iti, ITIH2, ITIH3, Laminin (complex), LRG1, MEGF10, PTX3, SERPING1, Smad2/3-Smad4, UMOD, VCAN, VitaminD3-VDR-RXR                                      | 32    | 20              | [Dermatological Diseases and Conditions, Hereditary Disorder, Immunological Disease]                |
| 3  | ABAT,ACAN,AGXT,AKR1C1/AKR1C2,BGN,COL12A1,COL1A2,COL3A1,COL6A1,COL6A2,COL6A3,collage, Collagen Alpha1,Collagen type I (complex), Collagen type III, collagenase, ERK, FBN1, Hepatic Transaminase, IL6R, JINK1/2, JUN/JUNB/JUND, N-cor, Nr1h, PCOLCE, Pdi, PEPCK, PPBP, Rar, Rxr, SERPINF1, SPARC, T3-TR-RXR, TGFBI, TIMP2                           | 30    | 19              | [Dermatological Diseases and Conditions, Inflammatory Disease, Organismal Injury and Abnormalities] |
| 4  | Ap1, Atrial Natriuretic Peptide, Cdc2, CLEC3B, CLU, CP, Cpla2, Cytokeratin, FTCD, ISLR, Keratin, KNG1, KRT1, KRT18, KRT2, KRT6B, KRT8, KRT86, KRT9, LRP, LRP8, LTF, MIR124, Na, K-ATPase, PCYOX1, PI3K (complex), plasminogen activator, Pmca, PRKAA, PROTEASE, SERPINE1, TLR2/TLR4, VIM, Vla-4, VTN                                               | 30    | 19              | [Cell Morphology, Embryonic Development, Hair and Skin Development and Function]                    |
| 5  | A1BG,Adaptor protein 1, AHSG, AMBP, APOH, BHMT, C4A/C4B, creatine kinase, CSF, ERK1/2, Ferritin, HDL, HDL-cholesterol, hemoglobin, Hif, HP, HPX, HSPG2, IL-1R, IL1RL1,INTERLEUKIN, KLKB1, LCN, ORM1, ORM2, PAEP, PDGF (family), RBP4, SAA, SERPINC1, SERPINF2, Stat3-Stat3, Tcf 1/3/4, TTR, VLDL                                                   | 28    | 18              | [Cellular Compromise, Inflammatory Response, Neurological Disease]                                  |
| 6  | aldehyde dehydrogenase, aldehyde dehydrogenase (NAD), ALDH, ALDH1A1, ALDH1L1, ALDH2, ALDH4A1, ALDH6A1, ALDOB, Aldose Reductase, ALT, B-cell receptor, BRMS1L, FBP1, Fc gamma receptor, Fcgr3, HEXB, HNF4α dimer, Iga, IgG, IgG1, IgG2a, Igg3, IGHA1, IGHA2, IGHG1, IGHG4, IGKC, Jnk, KRT10, PBLD, PCK2, Serpin, TF, transglutaminase               | 28    | 18              | [Humoral Immune Response, Inflammatory Response, Small Molecule Biochemistry]                       |
| 7  | 3-hydroxyacyl-CoA dehydrogenase, ACAT1, ADH1A, ADH1B, ADH4, ADH5, ADH6, alcohol dehydrogenase, ASS1, C/EBP, caspase, CDK4/6, Cyclin A, Cyclin D, Cyclin E, cytochrome C, cytochrome-c oxidase, E2f, EGLN, GLUD1, HADH, HMGCS2, HSD17B10, HSD17B4, MAOB, Mitochondrial complex 1, MTHFD1, Pkc(s), PRDX3, Rb, Rho gdi, SELENBP1, STC2, TCF/LEF, TPI1 | 28    | 18              | [Energy Production, Lipid Metabolism, Small Molecule Biochemistry]                                  |
| 8  | aldo,Alpha 1 antitrypsin, Apolipoprotein, C4, C4BP, Cathepsin, Ces, CES1, CFD, Collagen type II, Collagen type ix, CST3, CTSB, CTSD, CTSL, DDT, Gpd, GPD1, IL6,                                                                                                                                                                                    | 26    | 17              | [Cellular Compromise, Post-Translational                                                            |

|           |                                                                                                                                                                                                                                                                                                                                            |    |    |                                                                           |
|-----------|--------------------------------------------------------------------------------------------------------------------------------------------------------------------------------------------------------------------------------------------------------------------------------------------------------------------------------------------|----|----|---------------------------------------------------------------------------|
|           | Kallikrein, LUM, Lysosomal Protease, MIRLET7, Neuro-filament, RARRES1, Rbp, RIDA, Serine Protease, SERPINA3, SERPINA5, SERPINA7, SERPIND1, Timp, TPP1, trypsin                                                                                                                                                                             |    |    | Modification, Protein Degradation]                                        |
| <b>9</b>  | ACAC, Ap2, APOA1, APOB, APRT, ATP synthase, AZGP1, C3, CAT, CLSTN1, CPT1, EEF1A, EFEMP1, FABP1, FH, glutathione peroxidase, HSDL2 ,HYOU1, Ldh (complex), LDL, LDL-cholesterol, MAC, MPST ,Nfat (family), NPC2, P38 MAPK, PI3K (family), SLC6A2, SMAD1/5/9, Sod, SOD2, SOD3, SYK/ZAP, TH2 Cytokine, VLDL-cholesterol                        | 26 | 17 | [Organismal Injury and Abnormalities, Renal Damage, Renal Tubule Injury]  |
| <b>10</b> | ADRB, Angiotensin II receptor type 1, ANXA5, CPS1, DKK3, Fcer1, G protein, GST, GSTA3, HBB, HINT1, IDH1, IDH2, Ikb, LMBRD2, MAP2K1/2, MHC Class I (complex), MTORC2, NADPH oxidase, NFAT (complex), NFkB (family), Notch, Pak, PDIA3, peroxidase (miscellaneous), POLG, PPIA, PRDX2, PRDX6, QSOX1, Sapk, Secretase gamma, UGP2, VASN, Vegf | 26 | 17 | [Cancer, Endocrine System Disorders, Organismal Injury and Abnormalities] |



## SUPPLEMENTARY FIGURES

**Figure S1:** (A) Culture of bone marrow derived macrophages from C56BL/6 mice with IL-6+IL-6R for 12 day (B) IL-6+IL-6R along with M+R cotreatment shows an increased number of TRAP-positive osteoclast progenitor cells (n=3; p<0.05). Representative image acquired using 40X and the size of scale is 300  $\mu$ m.

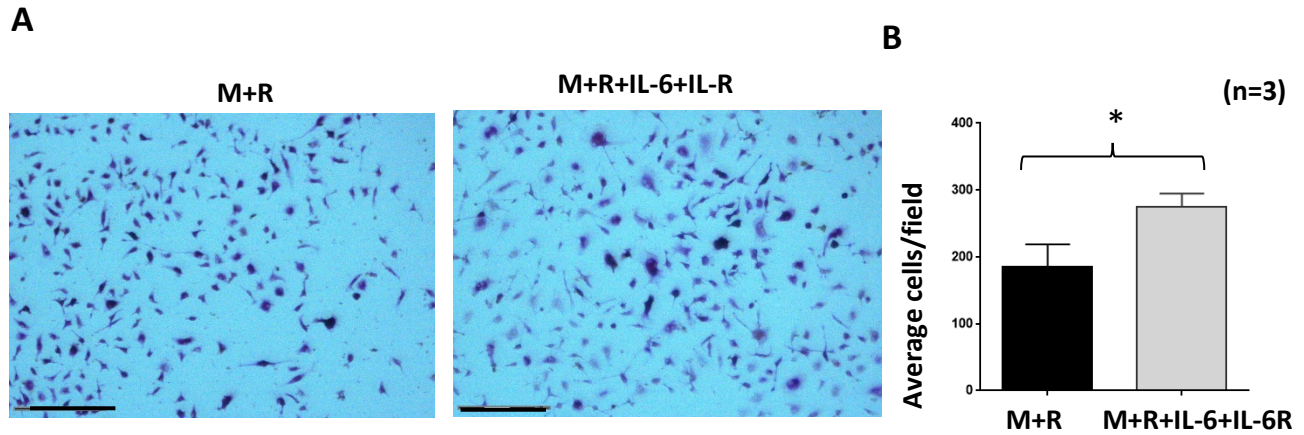

**Figure S2:** CD14 positive cells were sorted using anti-CD14 antibody (mouse monoclonal) on human THP1 monocytic cell line as well as on 3 independent human patients derived RASFs using Alexa Fluor anti mouse 488 antibody. All 3 human RASF were more than passage 5. Human THP1 cell line were found to be enriched with CD14+ cells for more than 17% cell populations. While human RASFs subjects had less than 1% to no staining for CD14 antibodies. Experimental RASF which is grown more than passage 5 are devoid of any visible contamination of CD14+ cells.

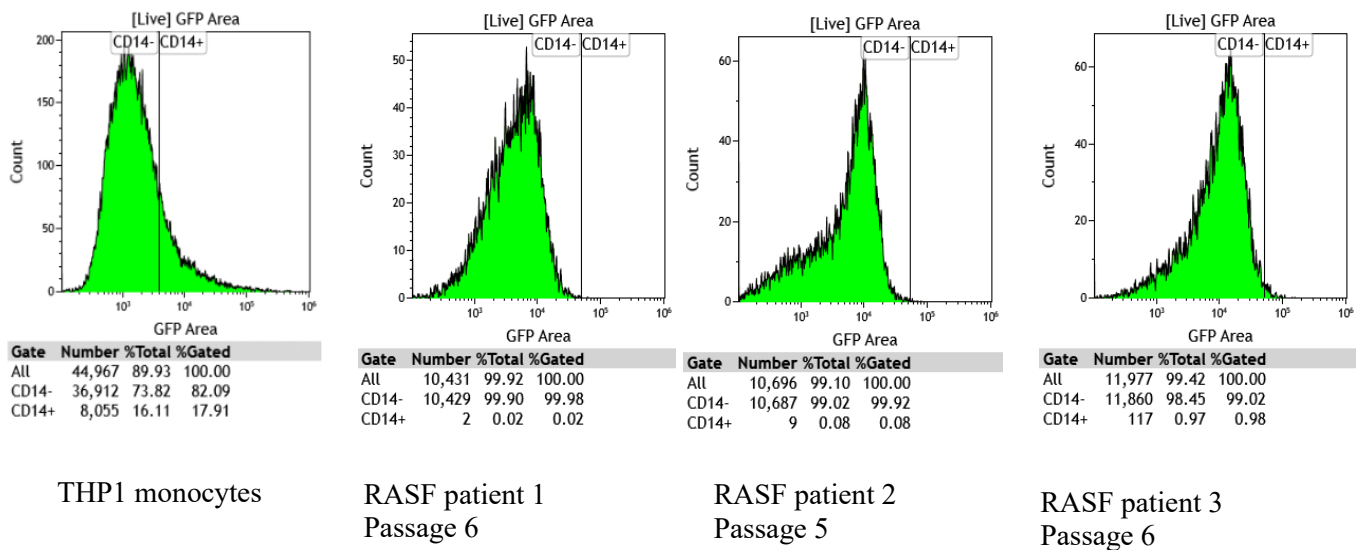

**Figure S3:** Gene Ontology study of affected biological function from RASFs were analyzed using metaspape.org gene ontology platform. **S1A)** Human RASFs stimulated with M-CSF/RANKL with 261 secreted proteins; **S1B)** Human RASFs stimulated with IL-6/IL-6R with 288 proteins and **S1C)** Human RASFs stimulated M-CSF/RANKL/IL-6/IL-6R (All) with 199 secretory proteins.

**S3A)**

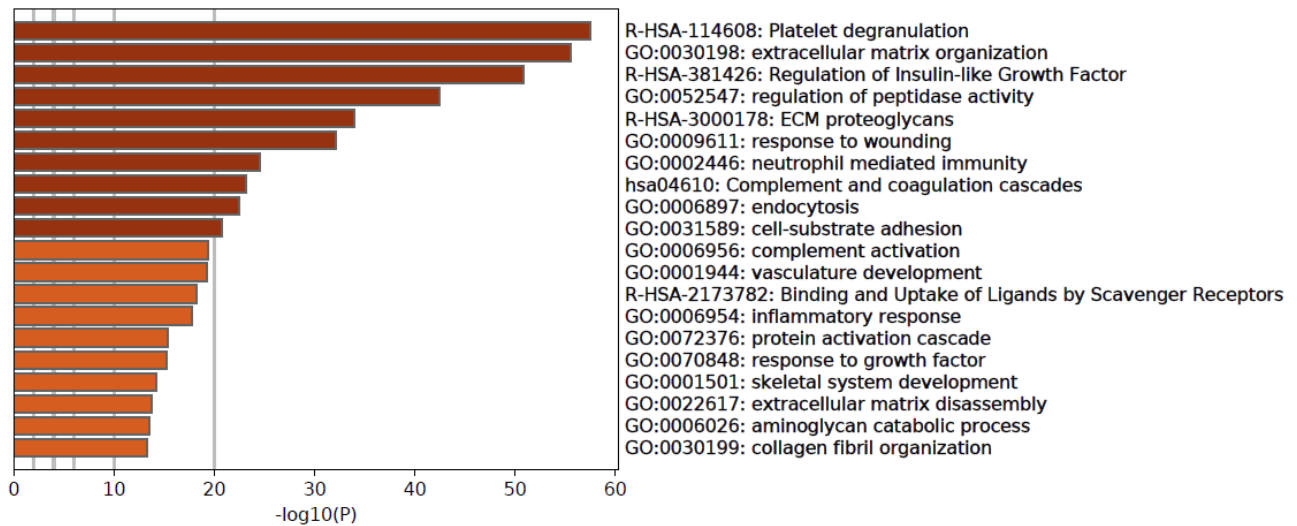

**S3B)**

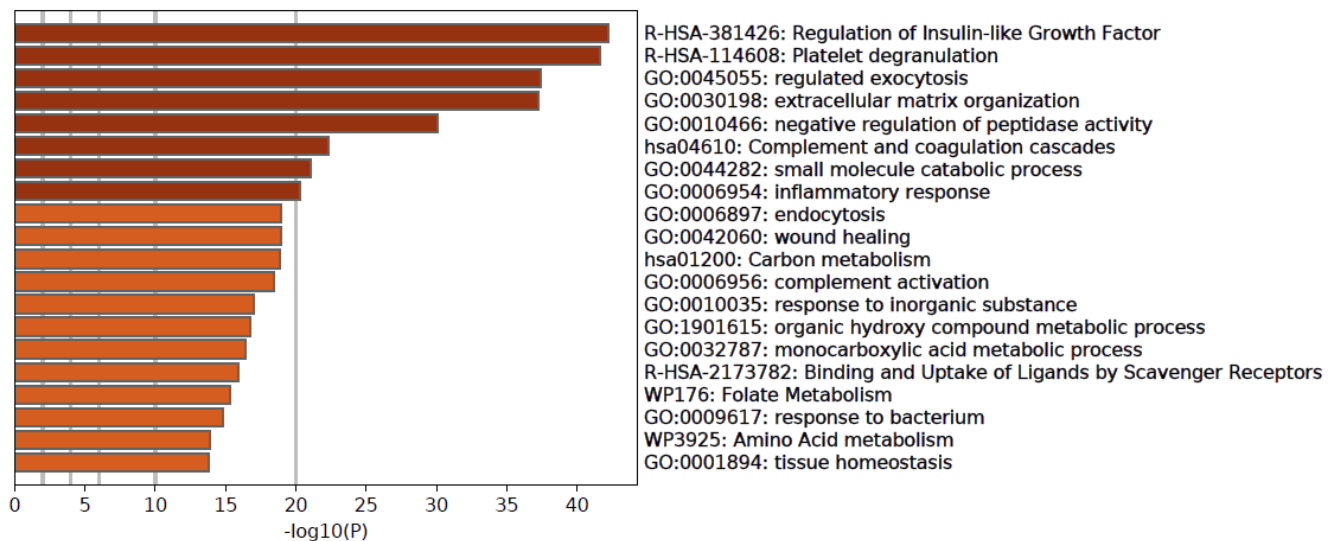

S3C)

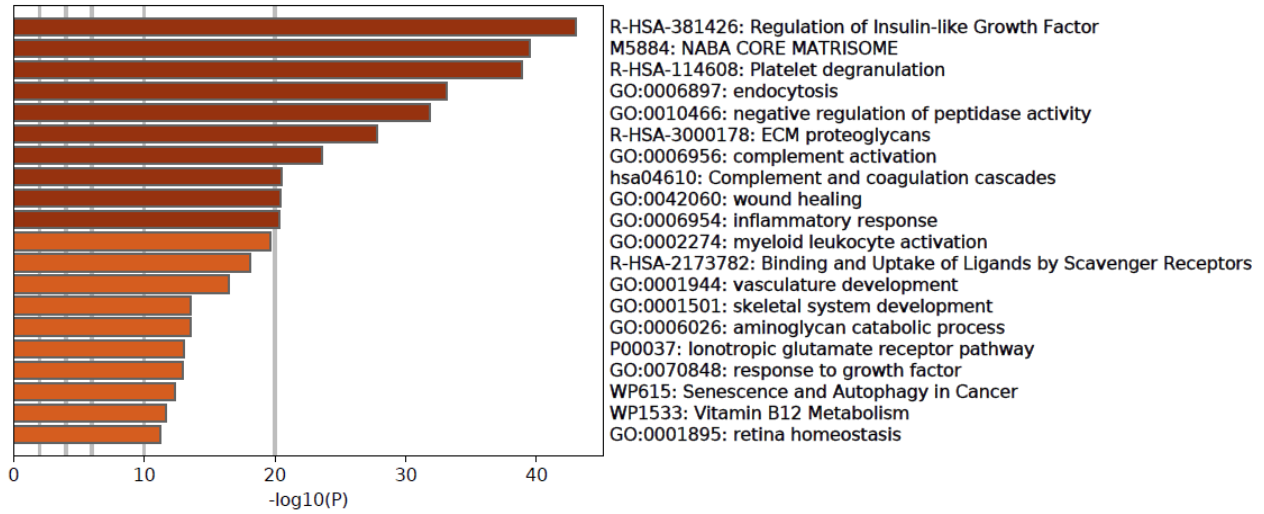

**Figure S4 :** Nuclear and cytoplasmic extract were evaluated for presence of Tubulin and Lamin B presence from NS, MR, IL-6+IL-6R, MR+IL-6+IL-6R and MR+IL-6+IL-6R+tofacinib treated samples (in main figure 5.A). We observed no cross contamination of Tubulin and or Lamin B in different cellular fractions.

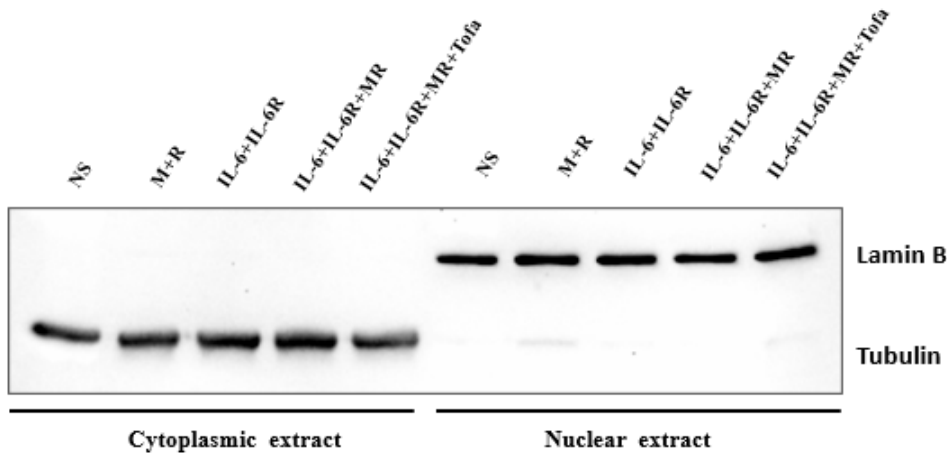

Supplement: Data_Sheet_1.pdf [file Data_Sheet_1.pdf]
